# Supplementary material for: The association of breast cancer patients survival and prior menopausal hormone therapy in women with type 2 diabetes
Source: PubMed Central journal article supplement (PMC11252321; doi:10.1038/s41598-024-65916-2), 2024-07-16
Supplement: 41598_2024_65916_MOESM1_ESM.pdf [file 41598_2024_65916_MOESM1_ESM.pdf]

**A Breast cancer and prediagnostic MHT use**

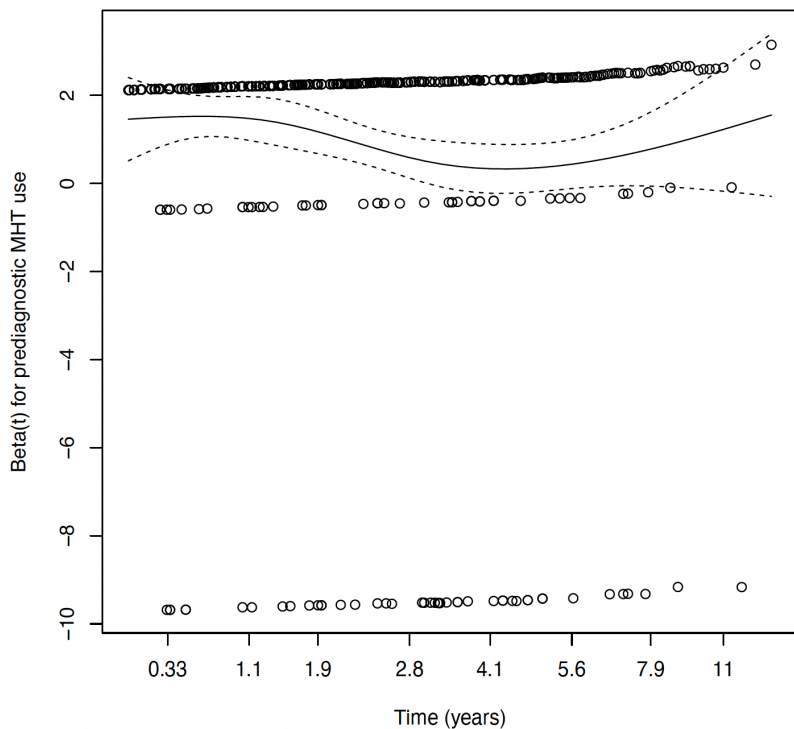

**B Other causes and prediagnostic MHT use**

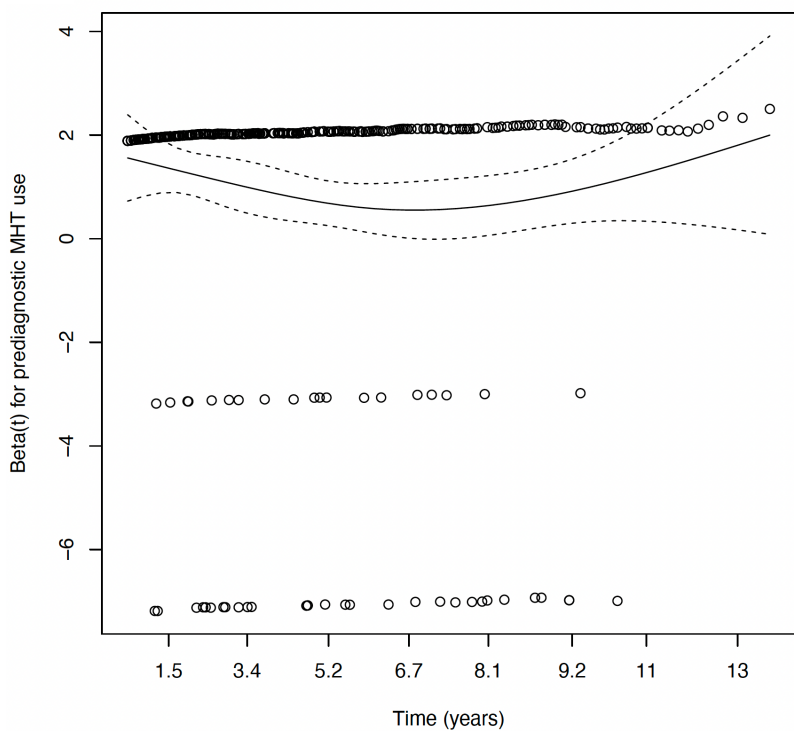

Supplementary Figure 1. Schoenfeld residual plots from breast cancer-specific mortality (A) and the mortality from other causes (B).
