# Supplementary material for: The association of breast cancer patients survival and prior menopausal hormone therapy in women with type 2 diabetes
Source: PubMed Central journal article supplement (PMC11252321; doi:10.1038/s41598-024-65916-2), 2024-07-16
Supplement: 41598_2024_65916_MOESM2_ESM.pdf [file 41598_2024_65916_MOESM2_ESM.pdf]

**Supplementary File:** ATC codes for different types of menopausal hormone therapy (MHT)

**Menopausal hormone therapy**

**Systemic**

|         |                                |
|---------|--------------------------------|
| G03FA01 | oestradiol/norethisterone      |
| G03FA17 | drospirenone/oestradiol        |
| G03CA03 | oestradiol                     |
| G03FB06 | oestradiol/medroxyprogesterone |
| G03FB05 | oestradiol/norethisterone      |
| G03FA16 | oestradiol/norethisterone      |
| G03FB08 | oestradiol/dydrogesterone      |
| G03FA14 | oestradiol/dydrogesteron       |
| G03FA12 | oestradiol/medroxyprogesterone |
| G03FB01 | oestradiol/norethisterone      |
| G03CX01 | tibolone                       |
| G03FA01 | dydrogesterone                 |
| G03CA57 | oestradiol                     |

**Local**

|         |            |
|---------|------------|
| G03CA03 | oestradiol |
| G03CA04 | oestradiol |
